# Supplementary material for: Increased alpha-synuclein tear fluid levels in patients with Parkinson’s disease
Source: PubMed Central journal article supplement (PMC7244583; doi:10.1038/s41598-020-65503-1), 2020-05-22
Supplement: 41598_2020_65503_MOESM1_ESM.pdf [file 41598_2020_65503_MOESM1_ESM.pdf]

# Increased alpha-synuclein tear fluid levels in patients with Parkinson's disease

## (Supplement)

Fabian Maass, MD<sup>1</sup>, Sebastian Rikker<sup>1</sup>, Vivian Dambeck<sup>1,5,6</sup>, Carmina Warth<sup>1,6</sup>, Lars Tatenhorst, PhD<sup>1,3,5,6</sup>, Ilona Csoti, MD<sup>2</sup>, Matthias Schmitz<sup>1,3</sup>, PhD, Inga Zerr, MD<sup>1,3</sup>, Andreas Leha, PhD<sup>4</sup>, Mathias Bähr, MD<sup>1,5</sup>, Paul Lingor, MD<sup>1,3,5,6,7</sup>

<sup>1</sup> Department of Neurology, University Medical Center Göttingen, Germany

<sup>2</sup> Gertrudis Clinic Parkinson-Center, Biskirchen, Germany

<sup>3</sup> DZNE, German Center for Neurodegenerative Diseases Göttingen, Germany

<sup>4</sup> Department of Medical Statistics, University Medical Center, Göttingen, Germany

<sup>5</sup> Cluster of Excellence Nanoscale Microscopy and Molecular Physiology of the Brain (CNMPB), Göttingen, Germany

<sup>6</sup> Center for Biostructural Imaging of Neurodegeneration (BIN), University Medical Center Göttingen, Germany

<sup>7</sup> Department of Neurology, Rechts der Isar Hospital of the Technical University Munich, 80333 Munich, Germany

**Corresponding author:**

Dr. med. Fabian Maass

Department of Neurology, University Medical Center Göttingen,

Robert-Koch-Str. 40, DE-37075 Göttingen, Germany

Phone: + 049 551 39 8398

Email: [fabian.maass@med.uni-goettingen.de](mailto:fabian.maass@med.uni-goettingen.de)

## General characteristics of Simoa human $\alpha$ -synuclein assay

(as reported by the manufacturer)

|                                      |                |
|--------------------------------------|----------------|
| <b>Calibration range</b>             | 0-1,000 pg/mL  |
| <b>Dynamic range</b>                 | 0-10,000 pg/mL |
| <b>Lower limit of detection</b>      | 0.955 pg/mL    |
| <b>Lower limit of quantification</b> | 4.12 pg/mL     |
| <b>Spike-recovery (serum/plasma)</b> | 86.0%          |
| <b>Spike-recovery (CSF)</b>          | 105.7%         |
| <b>Dilution Linearity (serum)</b>    | 94.7%          |
| <b>Dilution Linearity (CSF)</b>      | 88.0%          |
| <b>Typical sample volume</b>         | 19 $\mu$ l     |
| <b>Minimum sample volume</b>         | 2.1 $\mu$ l    |

## Precision characteristics of Simoa Human $\alpha$ -Synuclein immunoassay

(as reported by the manufacturer)

| <b>Sample</b> | <b>Mean <math>\alpha</math>Synuclein<br/>(pg/mL)</b> | <b>Within Run<br/>%CV (n=5)</b> | <b>Between Run<br/>%CV (n=5)</b> |
|---------------|------------------------------------------------------|---------------------------------|----------------------------------|
| Serum panel 1 | 1933.4                                               | 3.1                             | 3.2                              |
| Serum panel 2 | 3325.0                                               | 5.2                             | 2.2                              |
| Serum panel 3 | 563                                                  | 3.1                             | 2.3                              |
